# Supplementary material for: A Posteriori Dietary Patterns and Coronary Artery Disease in a Greek Case–Control Study
Source: MDPI journal article supplement (doi:10.3390/nu15224733), 2023-11-09
Supplement: s1 [file s1]

## Supplementary material

| <b>Table S1. Assessment of food groups</b> |                                                                                                                                                                                         |
|--------------------------------------------|-----------------------------------------------------------------------------------------------------------------------------------------------------------------------------------------|
| Refined starch                             | Refined breakfast cereals, chocolate cereals, white toast bread, white bread, sesame bagel, rice, spaghetti,                                                                            |
| Non-refined starch                         | All bran cereals, muesli, whole wheat toast bread, whole wheat bread                                                                                                                    |
| Fruits                                     | Apple, orange, banana, pear, kiwi, tangerine, apricots, peach, watermelon, melon, strawberries, figs, grapes, cherries, dried figs                                                      |
| Fresh fruit juice                          | Fresh fruit juice, fruit juice (100%)                                                                                                                                                   |
| Fruit juice                                | Fruit juice (<100%)                                                                                                                                                                     |
| Vegetables                                 | Tomatoes, cucumber, onions, turnip, garlic, carrot, lettuce, cabbage, spinach, broccoli, greens, eggplants, pumpkins, artichokes                                                        |
| Potatoes                                   | Baked potatoes, boiled potatoes, smashed potatoes                                                                                                                                       |
| Potatoes                                   | Fried potatoes                                                                                                                                                                          |
| Legumes                                    | Lentils, beans                                                                                                                                                                          |
| Fish (including fried fish)                | small fish, big fish                                                                                                                                                                    |
| Poultry                                    | Chicken breast, chicken leg                                                                                                                                                             |
| Red meat                                   | Pork, beef, lamb/goat, liver                                                                                                                                                            |
| Processed meat                             | Salami, sausage, turkey, bacon,                                                                                                                                                         |
| Dairy, full-fat                            | Milk full fat, yogurt full fat                                                                                                                                                          |
| Dairy, semi-fat                            | Milk, semi-fat, yogurt semi-fat                                                                                                                                                         |
| Dairy, non-fat                             | Milk non-fat, yogurt semi-fat                                                                                                                                                           |
| Cheese, full-fat                           | Feta, parmesan, gruyere                                                                                                                                                                 |
| Cheese, semi-fat                           | composite cheese                                                                                                                                                                        |
| Eggs                                       | Egg boiled, egg fried/scrambled                                                                                                                                                         |
| Fast foods                                 | Pizza, cheese pie, ham-cheese pie, spinach pie                                                                                                                                          |
| Sweets                                     | Chocolate almond, dark chocolate, mini chocolate, chocolate croissant, cookies, chocolate cake, ice cream, ravani, baklava, pecan pie, donut, nougat, halvah, sugared bun, melomakarono |
| Nuts and seeds                             | Almonds, peanuts, hazelnuts, cashew, walnuts, pine nut                                                                                                                                  |
| Beverages with sugar                       | Soft drinks                                                                                                                                                                             |
| Beverages, non-sugar                       | Soft drinks light                                                                                                                                                                       |
| Beverages with alcohol                     | Beer, red wine, white wine, whiskey, ouzo, liquor,                                                                                                                                      |
| Coffee                                     | Coffee                                                                                                                                                                                  |
